# 1        **Two contrasting mediodorsal thalamic circuits target the medial prefrontal cortex**

2        Polina Lyuboslavsky\*, Alena Kizimenko\*, and Audrey C. Brumback

3        \*equal contribution

4        Dell Medical School and Center for Learning and Memory at The University of Texas at Austin

5        1 University Station, Mail Code C7000, Austin, Texas 78712

6        Corresponding author: [audrey.brumback@austin.utexas.edu](mailto:audrey.brumback@austin.utexas.edu)

7        Word count: 6,000

8        Figures: 7

9        Tables: 2

10        Keywords: mediodorsal thalamus, neurophysiology, intrinsic properties, HCN channels,

11        prefrontal cortex

## 12        **ABSTRACT**

13        At the heart of the prefrontal executive and limbic networks is the mediodorsal thalamus  
14        (MD). Despite the importance of MD in a broad range of behaviors and neuropsychiatric  
15        disorders, virtually nothing is known about the physiology of neurons in MD. Here, we injected  
16        the retrograde tracer cholera toxin subunit B (CTB) into the medial prefrontal cortex (mPFC) of  
17        adult (8 – 12 week old) male and female wildtype mice. We prepared acute brain slices and  
18        used current clamp electrophysiology to measure and compare the intrinsic properties of the  
19        neurons in MD that project to mPFC (MD→mPFC neurons). MD→mPFC neurons are located  
20        predominantly in the medial (MD-M) and lateral (MD-L) subnuclei of MD. We found that that  
21        MD-M→mPFC neurons have longer membrane time constants, higher membrane resistance,  
22        less Hyperpolarization and Cyclic Nucleotide gated (HCN) channel activity, and more readily  
23        generate action potentials compared to MD-L→mPFC neurons. Additionally, MD-M→mPFC  
24        neurons have larger and more complex dendritic arbors compared to MD-L→mPFC neurons.  
25        These data demonstrating that the two populations of MD→mPFC neurons have distinct  
26        physiologies and morphologies suggests a differential role in thalamocortical information  
27        processing and potentially behavior.

## 1 INTRODUCTION

2 The mediodorsal thalamus (MD) receives inputs from multiple subcortical and cortical brain  
3 regions. In particular, MD shares rich reciprocal connections with the prefrontal cortex (PFC). In  
4 fact, PFC was originally defined as the cortex that receives projections from MD (Rose and  
5 Woolsey, 1948). As part of the prefrontal network, MD participates in cognitive processes such  
6 as attention, working memory, behavioral flexibility, and social motivation (Ouhaz et al., 2018).  
7 Acquired lesions in MD are associated with executive dysfunction in humans (Hwang et al.,  
8 2020). In experimental preparations, intact MD→PFC signaling is required for working memory  
9 e.g. (Alexander and Fuster, 1973; Fuster and Alexander, 1973; Parnaudeau et al., 2013; Bolkan  
10 et al., 2017), cognitive flexibility (Rikhye et al., 2018), and fear extinction (Lee et al., 2011).

11 In human neuropsychiatric disorders involving executive dysfunction, there is evidence of  
12 abnormal thalamic structure and abnormal connectivity between MD and PFC: autism (Cheon et  
13 al., 2011; Maximo and Kana, 2019), schizophrenia (Giraldo-Chica et al., 2018), and epileptic  
14 encephalopathy (Warren et al., 2017). Despite the importance of MD in a broad range of  
15 behaviors and human disease, virtually nothing is known about the physiology of the neurons in  
16 MD.

17 MD thalamus is composed of three distinct subnuclei (**medial, MD-M; central, MD-C; and**  
18 **lateral, MD-L**) (Ouhaz et al., 2018)). The majority of MD neurons that project to medial PFC  
19 (mPFC) reside in MD-M and MD-L (Alcaraz et al., 2016, 2018; Collins et al., 2018).  
20 Connectivity, lesion, and circuit manipulation studies have suggested a generalized model of  
21 MD-M playing a role in limbic functions, and MD-L participating in executive functioning (Vertes  
22 et al., 2015; Wolff and Vann, 2018; Grodd et al., 2020). Given their distinct patterns of afferents  
23 and possible divergent roles in behavior, we hypothesized that MD-M→mPFC and MD-  
24 L→mPFC neurons would have differences in intrinsic properties and morphology.

25 To test this hypothesis, we labeled adult mouse MD→mPFC neurons using retrograde  
26 tracers targeted to unilateral prelimbic and infralimbic cortex. In acute brain slices, we used  
27 whole-cell patch clamp recordings and morphological reconstruction to analyze and compare  
28 subthreshold and suprathreshold intrinsic properties and dendritic morphology of labeled MD-  
29 M→mPFC and MD-L→mPFC neurons. We found significant differences in neuronal  
30 morphology, intrinsic membrane physiology, and action potential dynamics between MD-L and  
31 MD-M neurons. These findings suggest that MD provides at least two ascending information  
32 pathways to mPFC which process physiological information in fundamentally different ways.

## 1 MATERIALS AND METHODS

### 2 Animals

3 All experiments were conducted in accordance with procedures established by the  
4 Institutional Animal Care and Use Committee (IACUC) at The University of Texas at Austin.  
5 Most mice were bred in-house and weaned at 3 weeks of age. Adult mice were group-housed  
6 by sex in open-top cages and fed *ad libitum*. Animals were kept in reverse lighting conditions  
7 (12 h / 12 h dark / light cycle) and were typically euthanized for patch clamp physiology  
8 experiments in the mornings, around the beginning of the animals' dark cycle. In our  
9 experiments, we used male and female C57Bl/6J mice from Jackson Laboratories (strain #  
10 000664), *Fmr1* WT mice (a gift from Dan Johnston (Huber et al., 2002)), and *Drd2-Cre* mice  
11 (B6.FVB(Cg)-Tg(Drd2-cre)ER44Gsat/Mmcd; MMRRC strain 032108). There were no systematic  
12 differences in electrophysiological properties or cellular morphology between male and female  
13 mice, or between the various strains of wildtype mice used.

### 14 Fluorescent labeling of specific neuron populations

15 Mice were anesthetized with 2% isoflurane and mounted in a stereotactic frame.  
16 Craniotomies were made according to stereotaxic coordinates relative to Bregma. To label  
17 mediodorsal thalamus (MD) neurons that project to ipsilateral prelimbic and infralimbic cortices  
18 (ipsilateral mPFC), we injected fluorescently-labeled cholera toxin subunit B (CTB, 500 µg / 100  
19 µL, Molecular Probes, Thermo Fisher Scientific, Waltham, MA, USA) into ipsilateral mPFC  
20 (Nanofil Syringe and Pump UMP3, World Precision Instruments). Coordinates for injection into  
21 ipsilateral mPFC were (in mm relative to Bregma): -1.7 anterior-posterior (AP), +0.3  
22 mediolateral (ML) and -2.75 dorsoventral (DV). After needle insertion, we waited 5 minutes  
23 before starting the injection of 450 nL at 100 nL / minute into mPFC. We waited 5 minutes after  
24 the end of the injection before slowly withdrawing the syringe needle. We waited 3-6 days  
25 following retrograde tracer injections before performing experiments. At the time of the  
26 experiments, we visually verified that retrograde tracer injections were targeted appropriately,  
27 and that tracer was not present in nearby structures.

### 28 Slice preparation

29 Except as noted, all reagents for patch clamp electrophysiology solutions were purchased  
30 from Sigma Aldrich. We used ice-cold cutting solution containing (in mM): 205 sucrose, 25

1 NaHCO<sub>3</sub>, 2.5 KCl, 1.25 NaH<sub>2</sub>PO<sub>4</sub>, 7 MgCl<sub>2</sub>, 7 dextrose, 3 Na pyruvate, 1.3 sodium ascorbate,  
2 and 0.5 CaCl<sub>2</sub> bubbled with 95% O<sub>2</sub> / 5% CO<sub>2</sub>. Mice 8 to 12 weeks old were deeply anesthetized  
3 with intraperitoneal injection of ketamine / xylazine (200/100 mg/kg; Acor/Dechra), transcardially  
4 perfused with 20 mL of ice-cold cutting solution, and then decapitated. We prepared 300 µm  
5 coronal slices (Leica VT1200). Slices were incubated in holding solution containing (in mM): 125  
6 NaCl, 25 NaHCO<sub>3</sub>, 2.5 KCl, 1.25 NaH<sub>2</sub>PO<sub>4</sub>, 25 dextrose, 2 CaCl<sub>2</sub>, 2 MgCl<sub>2</sub>, 1.3 sodium  
7 ascorbate, and 3 Na pyruvate at 37±1°C for 30 minutes. Slices were then kept for at least 30  
8 minutes at room temperature before being used for recordings.

## 9 **Intracellular recordings**

10 Artificial cerebrospinal fluid (ACSF) contained (in mM): 125 NaCl, 25 NaHCO<sub>3</sub>, 12.5  
11 dextrose, 2.5 KCl, 1.25 NaH<sub>2</sub>PO<sub>4</sub>, 2 CaCl<sub>2</sub> and 1 MgCl<sub>2</sub>. Slices were continuously perfused with  
12 ACSF in an immersion chamber (Warner Instruments) with temperature maintained at 32.5 ±  
13 1°C (Warner Instruments TC-324C). We did not add synaptic blockers to the ACSF.

14 Somatic whole-cell patch recordings were obtained from visually-identified retrogradely-  
15 labeled neurons in the medial (MD-M) or lateral (MD-L) subnuclei, using DODT (Zen 2.5 blue  
16 addition, Zen pro) contrast microscopy and epifluorescence on an upright microscope (Zeiss  
17 Examiner D1). Patch electrodes (tip resistance = 3–6 MΩ) were filled with the following (in mM):  
18 118 K-gluconate, 10 KCl, 10 HEPES, 4 MgATP, 1 EGTA, 0.3 Na<sub>3</sub>GTP and 0.3% biocytin (pH  
19 adjusted to 7.2 with KOH; 282 mOsm). For some cells, we added 16 µM Alexa 488 or Alexa  
20 594 to visualize the dendritic arbor under epifluorescence. There was no qualitative difference  
21 in the recordings made from cells with Alexa dye in the internal solution and those without.  
22 Recordings were made with Clampex 10.7 software running a Multiclamp 700B (Molecular  
23 Devices). Signals were digitized at 20,000 Hz and lowpass filtered at 4,000 Hz.

24 Gigaohm seal was achieved in voltage clamp, and after establishing whole-cell  
25 configuration, we immediately switched to current clamp to measure the resting membrane  
26 potential. After the membrane potential stabilized, data were collected at the cell's resting  
27 membrane potential. Then, all cells were provided steady state current to maintain the  
28 membrane potential at -65 +/- 3 mV. With the exception of the RMP measurement, all data  
29 reported here are taken from the recordings performed at -65 mV. Series resistance was usually  
30 10–20 MΩ, and experiments were discontinued above 30 MΩ or if action potentials failed to

1 overshoot 0 mV. Experiments typically lasted <30 minutes total. Membrane potentials are  
2 reported without correcting for liquid membrane junction potential.

### 3 **Morphology**

4 After recording, slices were stored overnight at 4°C in 4% PFA (Electron Microscopy  
5 science) and moved to phosphate-buffered saline (PBS) the following morning. Within 60 days,  
6 we stained cells with DAB to reveal biotin filling. First, we washed slices in 0.1M PBS for 30  
7 minutes (6 x 5 minutes) with the consecutive washing in 1% Triton (Fisher Chemical) and 0.5%  
8 H<sub>2</sub>O<sub>2</sub> (Fisher Chemical) solutions in PBS for 30 minutes each at room temperature (RT). After  
9 washing in 0.1M PBS again for 30 minutes, we incubated slices in Reagent A + Reagent B +  
10 0.5% TritonX + 0.1% BSA (Sigma-Aldrich) in PB for 2 days at 4°C (ABC reagent, VectaStain  
11 Elite ABC-HRP kit, Vector laboratories). After the 2 day incubation, we washed slices in PBS for  
12 an hour (6 x 10 minutes). Then we incubated slices with DAB (DAB substrate kit, Vector  
13 laboratories) solution for one hour at RT. After that we added 3% H<sub>2</sub>O<sub>2</sub> to the slices (one drop  
14 every 20 minutes) until they reached the desirable brown color. Then we washed slices again  
15 for 30 minutes and dehydrated them in ascending concentrations of glycerol (Fisher Chemical)  
16 from 20% to 100% for 10 minutes per concentration. We mounted slices on slides using 100%  
17 glycerol as the mounting medium. We reconstructed cells using the NeuroLucida System (MBF  
18 Bioscience Inc. Williston, VT) on Leitz Diaplan microscope and MicroFire Optronics camera  
19 using a 40x objective. We placed the zero point in the center of the soma (at the widest part of  
20 the soma) and traced dendrites using a fine focusing wheel. We considered branches as cut  
21 when they visibly went out of the slice. We considered cells usable for analysis if they had fully-  
22 visualized dendritic arbors with well-defined terminals and with the majority of branches being  
23 present. All neuronal morphologies will be cataloged at [www.NeuroMorpho.org](http://www.NeuroMorpho.org).

### 24 **Histology**

25 To create an atlas of fixed brain slice images onto which we could map all recorded cells,  
26 we injected an 11 week old C57Bl/6 wildtype mouse with CTB into the prelimbic and infralimbic  
27 cortices as above. The animal was deeply anesthetized with ketamine/xylazine and  
28 transcardially perfused with paraformaldehyde (PFA (Sigma-Aldrich)) 4% in phosphate-buffered  
29 saline (1x PBS). We prepared 150 µm thick coronal slices with DAPI-containing mounting  
30 medium (VectaShield HardSet with DAPI, Vector laboratories). We imaged the slices at 5x  
31 using Zeiss Axio Imager 2 and stitched images together using AxioVision software.

## 1 **Data analysis: Electrophysiology**

2 We estimated the resting membrane potential (RMP) as the membrane voltage recorded  
3 immediately after switching to current clamp configuration. We calculated membrane time  
4 constant ( $\tau_m$ ) as the time at which the membrane voltage decayed to  $1/e$  of the initial value  
5 following 1000 ms  $\times$   $-10$  pA current steps averaged over 10 repetitions. We estimated  
6 membrane resistance ( $R_m$ ) from the steady-state voltage change measured in response to 1000  
7 ms current steps ranging from  $-60$  to  $+60$  pA in 5 pA increments. We calculated  $R_m$  as the slope  
8 of the linear relationship between subthreshold steady-state voltage and input current.

9 To estimate HCN channel activity, we calculated the voltage sag in response to 1000 ms  
10 current steps ranging from  $-250$  to  $-150$  pA in 25 pA increments. We identified the sweep that  
11 elicited a peak hyperpolarization of  $-100$  mV and measured voltage sag (minimum voltage) –  
12 (steady state voltage).

13 We measured the absolute value of the afterhyperpolarization (AHP) following 1000 ms  
14 depolarizing current steps as the minimum voltage in the 250 ms following the offset of the  
15 current step. To measure the net AHP compared to baseline, we subtracted the AHP absolute  
16 value from the membrane potential 4 seconds following the offset of the current step (when the  
17 membrane potential had returned to baseline). For experiments in which we washed on ZD7288  
18 ( $20 \mu\text{M}$ ; Tocris Cat#1000) to block HCN channel activity, we measured the membrane potential  
19 in the post-drug state at the same time point at which the AHP was measured in the pre-drug  
20 state.

21 We quantified action potential firing during one second current steps from 0 to  $+60$  pA in 5  
22 pA increments and from 0 to  $+350$  pA in 25 pA increments. We estimated the action potential  
23 threshold as the point at which the third derivative of the membrane potential was maximal. We  
24 categorized action potentials (“spikes”) as belonging to the following categories: rebound, burst,  
25 tonic, or total. We counted spikes as belonging to the rebound if they occurred within 1 second  
26 after the offset of a negative current step. We classified spikes as belonging to a depolarization-  
27 induced burst if they occurred within 500 ms of the onset of a depolarizing current step, had an  
28 inter-spike interval of  $< 40$  milliseconds, had an inter-ISI ratio of 0.50 - 1.99, and the total  
29 number of spikes in that sweep’s step was less than or equal to 15. During depolarizing current  
30 steps containing 15 or fewer total spikes, the first spike to have an inter-ISI ratio of  $\geq 2$  was  
31 classified as the first tonic spike. The rest of the spikes in the train following the first tonic spike

1 were also classified as tonic. In current steps in which the number of spikes during the step  
2 exceeded 15, all spikes were grouped together as “total spikes”, as we could not reliably  
3 distinguish burst from tonic spiking. To quantify accommodation, we identified the lowest  
4 amplitude depolarizing sweep to have  $\geq 12$  tonic action potentials during the depolarizing step.  
5 We estimated the accommodation index of tonic spikes by calculating the slope of the linear  
6 relationship between the interspike intervals for each successive action potential during the  
7 current step (**Figure 5**).

## 8 **Data analysis: Neuronal morphology**

9 We used NeuroLucida Explorer (MBF Bioscience Inc. Williston, VT) to analyze the cell's  
10 morphological parameters. We measured dendritic length (sum total length of all branches of  
11 the neuron ( $\mu\text{m}$ )) and average dendritic length: dendritic length / number of primary dendrites.  
12 We assessed total number of branching points (nodes) per cell and total number of last order  
13 branches (terminals) per cell. In addition to first order branches, we also analyzed the number of  
14 secondary and tertiary branches. We used convex hull analysis to measure area ( $\mu\text{m}^2$ ) and  
15 volume ( $\mu\text{m}^3$ ). These parameters correspond to the area and volume of a convex polygon that  
16 connects tips of distal processes. For Sholl analysis (Sholl, 1953), we placed concentric circles  
17 in 15  $\mu\text{m}$  radius increments around the cell centered at the cell body. We counted the number of  
18 points where cell processes intersect with Sholl circles. Within each circle, we also measured  
19 dendritic length. We calculated cellular complexity using the following formula:

$$20 \quad \text{Complexity} = (\text{sum of terminal orders} + \# \text{ of terminals}) \cdot \frac{\text{total dendritic length}}{\# \text{ of primary dendrites}}$$

21 For each terminal in a cell, the *terminal order* is the total number of sister branches  
22 encountered as one traces a path from that terminal to the cell body. The *sum of terminal orders*  
23 is the sum of all *terminal orders* for each cell.

## 24 **Statistics**

25 We used the ‘sampsizepwr’ function in MATLAB to calculate sample sizes based on  
26 preliminary data. For patch clamp electrophysiology experiments, we estimated that between  
27 MD-M and MD-L, to detect a difference in membrane time constant of 25% with a standard  
28 deviation of 20 ms, given  $\alpha$  of 0.05 and power of 0.8, we required at least 16 cells per group.  
29 For neuronal morphology experiments, we estimated that between MD-M and MD-L, to detect a



1 difference in complexity of 100% with a standard deviation of 50,000  $\mu\text{m}$ , given  $\alpha$  of 0.05 and  
2 power of 0.8, we required 5 cells per group.

3 For all data sets, we tested if data followed a Gaussian distribution. If data were normally  
4 distributed, we used two-tailed unpaired Student's t-tests to compare two groups or two-tailed  
5 paired Student's t-tests for comparison of predrug / postdrug treatments in individual neurons.  
6 For data that were not normally distributed, we used the non-parametric Mann-Whitney test. To  
7 test significance of differences between groups in action potential firing as a function of input  
8 current and for Sholl analyses, we used two-way ANOVA with Sidak's test to correct for multiple  
9 comparisons.

10 All electrophysiology quantifications were performed using custom-written code in Matlab (to  
11 be made publicly available on GitHub). All statistical analyses except for power analysis were  
12 performed using GraphPad Prism version 8.0.0 (GraphPad Software, San Diego, California  
13 USA, [www.graphpad.com](http://www.graphpad.com)). All graphs were made using GraphPad Prism and transferred to  
14 Adobe Illustrator version 24.3 for final presentation.

15 All sample sizes are reported as the number of neurons. We typically prepared 3 brain slices  
16 per animal, and recorded 1 neuron per brain slice. In the text, all data are reported as mean  $\pm$   
17 standard deviation. In the figures, all data are plotted as mean  $\pm$  standard error. We defined  $\alpha \leq$   
18 0.05 with \*  $p < 0.05$ ; \*\*  $p < 0.01$ ; \*\*\*  $p < 0.001$ ; \*\*\*\*  $p < 0.0001$ .

19 We removed one outlier from the rebound action potential data set (rheobase = -60 mV)  
20 based on GraphPad Prism's ROUT method of identifying outliers (Q = 1%; Motulsky and Brown  
21 2006).

## 22 RESULTS

23 To test the hypothesis that the MD→mPFC projection consists of different physiological and  
24 morphological cell types, we used whole cell patch clamp electrophysiology coupled with  
25 analysis of cellular morphology. We injected a fluorescent retrograde tracer (CTB) into ipsilateral  
26 prelimbic and infralimbic cortices (**Figure 1A,B**). After 3-6 days, we euthanized the animal,  
27 prepared acute coronal brain slices, and recorded from individual visually-identified MD→mPFC  
28 neurons. We distinguished the medial (MD-M), central (MD-C), and lateral (MD-L) subnuclei  
29 within MD based on the distribution of fluorescent labeling and distance from midline. The vast



1 majority of labeled neurons were present in the medial (MD-M) and lateral (MD-L) divisions  
2 (**Figure 1C-E**).

3 **Subthreshold properties: membrane time constant and input resistance.** We compared  
4 the intrinsic membrane properties of medial and lateral MD→mPFC neurons. There was no  
5 significant difference in resting membrane potential (**Figure 2B**; MD-M:  $-59.29 \pm 8.85$  mV ( $n =$   
6  $42$  neurons); MD-L:  $-59.28 \pm 7.79$  ( $n = 110$  neurons); Mann-Whitney test;  $U = 2154$ ;  $p = 0.52$ ).  
7 The membrane time constant influences a neuron's intrinsic and synaptic physiology. We  
8 estimated the membrane time constant with repeated small-amplitude ( $-10$  pA) current steps  
9 (**Figure 2A**). We found that lateral neurons had shorter membrane time constants than medial  
10 neurons (**Figure 2C**; MD-M:  $76.46 \pm 26.92$  ms ( $n = 36$  neurons); MD-L:  $57.33 \pm 18.38$  ms ( $n =$   
11  $101$  neurons); Mann-Whitney test;  $U = 993.5$ ;  $p < 0.0001$ ). Membrane time constant is the  
12 product of cellular membrane resistance  $R_m$  and cellular capacitance  $C_m$ . We estimated  
13 membrane resistance based on the voltage response to subthreshold current steps, and found  
14 that lateral neurons had lower membrane resistance than medial cells (**Figure 2D**; MD-M:  $795 \pm$   
15  $502.6$  ( $n = 34$  neurons); MD-L:  $484.9 \pm 372.7$  ( $n = 101$  neurons); Mann-Whitney test;  $U = 1056$ ;  
16  $p = 0.0007$ ). We found that in both medial and lateral cells, membrane time constant correlated  
17 with membrane resistance (**Figure 2E**; 95% CI for slope of linear regression: MD-M: 0.012 to  
18 0.043; MD-L: 0.021 to 0.036; Spearman correlation: MD-M:  $r_s = 0.493$ ;  $p = 0.0036$ ;  $r_s =$  MD-L  
19  $0.432$ ;  $p < 0.0001$ ).

20 **Subthreshold properties: HCN channel related properties.**  $R_m$  depends on multiple  
21 factors including Hyperpolarization and Cyclic Nucleotide (HCN) activated channels. We  
22 estimated HCN channel activity by measuring the voltage sag in response to hyperpolarizing  
23 current steps (**Figure 3A**). We found that lateral cells had a higher degree of voltage sag than  
24 medial cells (**Figure 3B**; MD-M:  $6.398 \pm 3.957$  ( $n = 43$  neurons); MD-L:  $8.627 \pm 4.521$  ( $n = 109$   
25 neurons); Mann-Whitney test;  $U = 1683$ ;  $p = 0.0066$ ). To estimate the relationship between  
26 cellular membrane resistance and the HCN channel activity, we calculated the relationship  
27 between  $R_m$  and the voltage sag for each neuron. We found that membrane resistance was  
28 inversely related to voltage sag (**Figure 3C**; 95% CI for slope of linear regression: MD-M:  $-106.5$   
29 to  $-44.19$ ; MD-L:  $-62.07$  to  $-38.63$ ; Spearman correlation: MD-M:  $r_s = -0.6731$ ;  $p < 0.0001$ ; MD-L:  
30  $r_s = -0.654$ ;  $p < 0.0001$ ). Voltage sag was abolished in both cell types following bath application  
31 of ZD7288, an inhibitor of HCN channel activity (**Figure 3D**; MD-M: pre-ZD:  $4.02 \pm 1.783$ ; post-  
32 ZD:  $0.2996 \pm 0.6083$  mV ( $n = 23$  neurons; Two-tailed paired T test;  $t = 6.770$ ,  $df = 9$ ;  $p < 0.0001$ );

1 MD-L: pre-ZD:  $8.726 \pm 3.169$ ; post-ZD:  $0.4577 \pm 0.4892$  mV ( $n = 18$  neurons); Two-tailed paired  
2 T test;  $t = 11.15$ ,  $df = 17$ ;  $p < 0.0001$ ). Application of ZD7288 to MD-L cells increased  $R_m$  to MD-  
3 M levels (**Figure 3E**; pre-ZD:  $476.7 \pm 349.4$  M $\Omega$ ; post-ZD:  $903.8 \pm 389.4$  M $\Omega$  ( $n = 17$  neurons);  
4 Wilcoxon sum of ranks 149, -4,  $W = 145$ ;  $p = 0.0001$ ). There was no effect of ZD7288 on  $R_m$  in  
5 MD-M neurons (pre-ZD:  $854.4 \pm 411.5$  M $\Omega$ ; post-ZD:  $876.3 \pm 467.5$  M $\Omega$  ( $n = 10$  neurons);  $t =$   
6  $0.1481$ ,  $df = 9$ ;  $p = 0.8855$ ).

7 Following a depolarizing current step, the membrane potential hyperpolarizes transiently  
8 before returning to baseline (**Figure 4A**). This afterhyperpolarization (AHP) is abolished by  
9 ZD7288, an inhibitor of HCN channel activity (**Figure 4D**), and thus we used AHP amplitude as  
10 a complementary measure to voltage sag to estimate HCN channel activity in MD→mPFC  
11 neurons (Fan et al., 2005). We measured the amplitude of the AHP as the most negative  
12 potential in the 500 ms after the offset of the most positive (+350 pA) current step (at which  
13 there is no difference between groups in the number of action potentials generated). Lateral  
14 cells had a more robust AHP than medial cells (**Figure 4B**; MD-M:  $-73.18 \pm 7.71$  mV ( $n = 40$   
15 neurons); MD-L:  $-76.87 \pm 6.85$  mV ( $n = 103$  neurons); Two-tailed T test,  $t=2.797$ ,  $df=141$ ;  $p =$   
16  $0.0059$ ). For both cell types, the AHP correlated with the voltage sag (**Figure 4C**; 95% CI for  
17 slope of linear regression: MD-M: -1.858 to -0.8596; MD-L: -1.145 to -0.6880; Spearman  
18 correlation: MD-M:  $r_s = -0.6716$ ;  $p < 0.0001$ ; MD-L:  $r_s = -0.613$ ;  $p < 0.0001$ ). The AHP was  
19 abolished in the presence of ZD7288, a selective blocker of HCN channels (**Figure 4D**; pre-ZD:  
20  $-12.43 \pm 6.179$  ( $n = 25$  neurons); post-ZD:  $6.185 \pm 3.51$  ( $n = 23$  neurons); Two-tailed paired T  
21 test;  $t = 11.91$ ,  $df = 22$ ;  $p < 0.0001$ ).

22 **Tonic spiking properties.** We measured the properties of action potential spiking in  
23 response to depolarizing currents steps (**Figure 5A**). Thalamic neurons engage in two modes of  
24 action potential firing: bursting and tonic firing (**Figure 5C-E**). Burst spikes are produced by low-  
25 voltage activated calcium channels (Ca<sub>v</sub>3, previously known as T-type) along with voltage-gated  
26 sodium and potassium channels, whereas tonic spikes do not require calcium channels.  
27 Because they are mediated by different mechanisms, we analyzed burst and tonic spikes  
28 separately (**Figure 5C-E**). We found that compared to lateral cells, medial neurons had an  
29 increased input-output curve for tonic spiking (**Figure 5F**; Two-way ANOVA: MD subnucleus  $F$   
30 (1, 592) = 11.17;  $p = 0.0009$ ; Sidak's test: 50 - 75 mV, adjusted  $p < 0.05$ ). Accordingly, medial  
31 neurons had a lower rheobase (the minimum current required to elicit spiking) for tonic spiking  
32 compared to lateral neurons (**Figure 5G**; MD-M:  $22.47 \pm 14.77$  pA ( $n = 18$  neurons); MD-L:

1 34.95 ± 16.79 pA ( $n = 50$  neurons); Mann-Whitney test;  $U = 266$ ;  $p = 0.0095$ ). In contrast, the  
2 membrane potential threshold for tonic spiking was higher in medial cells compared to lateral  
3 cells (**Figure 5F**; MD-M:  $-21.8 \pm 4.481$  mV ( $n = 38$  neurons); MD-L:  $-25.98 \pm 6.877$  mV ( $n = 101$   
4 neurons); Mann-Whitney test;  $U = 1235$ ;  $p = 0.0011$ ). When provided with long-lasting inputs,  
5 neurons tend to fire action potentials that are regularly spaced (non-accommodating) or with  
6 increasing inter-spike intervals (accommodating). Both cell populations had accommodating and  
7 non-accommodating neurons and there was no difference in the mean between the groups  
8 (**Figure 5I**; MD-M:  $6 \pm 6.09$  ( $n = 39$  neurons); MD-L:  $9.35 \pm 11.25$  ( $n = 101$  neurons); Mann-  
9 Whitney test;  $U = 1672$ ;  $p = 0.1681$ ).

10 **Burst spiking properties.** In thalamic neurons, bursts of 2 or more tightly-spaced action  
11 potentials can be elicited in response to direct depolarization (**Figure 5C & 6A**). Lateral  
12 MD→mPFC neurons had a higher rheobase for firing bursts compared to medial neurons  
13 (**Figure 6B**; MD-M:  $9.09 \pm 5.55$  pA ( $n = 31$  neurons); MD-L:  $15.99 \pm 9.99$  pA ( $n = 95$  neurons);  
14 Mann-Whitney test;  $U = 820$ ;  $p = 0.0002$ ). Similar to differences in tonic spike threshold, we  
15 identified a more hyperpolarized action potential threshold in the lateral neurons compared to  
16 medial neurons with burst firing (**Figure 6C**. MD-M:  $-30.43 \pm 5.528$  mV ( $n = 42$  neurons); MD-L:  
17  $-33.76 \pm 7.435$  mV ( $n = 109$  neurons); Mann-Whitney test;  $U = 1626$ ;  $p = 0.0056$ ). The overall  
18 input / output curve for burst spikes was unchanged between the two groups (**Figure 6D**. Two-  
19 way ANOVA,  $p = 0.1322$ )

20 Bursting can also be induced in response to release of hyperpolarization, so we tested the  
21 rheobase for “rebound” burst spikes following hyperpolarizing steps of varying amplitude  
22 (**Figure 6E**). Lateral cells required more hyperpolarization to induce rebound bursting compared  
23 to medial cells (**Figure 6F**; MD-M:  $-11.83 \pm 6.52$  mV ( $n = 34$  neurons); MD-L:  $-20.09 \pm 12.6$  mV  
24 ( $n = 93$  neurons); Mann-Whitney test;  $U = 907.5$ ;  $p = 0.0002$ ). The difference in rebound action  
25 potential threshold between groups did not reach statistical significance (**Figure 6G**; MD-M: -  
26  $33.22 \pm 5.687$  mV ( $n = 42$  neurons); MD-L:  $-35.04 \pm 6.674$  mV ( $n = 106$  neurons); Two-tailed t-  
27 test;  $t = 1.552$ ,  $df = 146$ ;  $p = 0.1227$ ). The overall input / output curve for rebound burst spikes  
28 was also similar between the two groups (**Figure 6H**. Two-way ANOVA,  $p = 0.9879$ ).

29 **Cellular Morphology:** We filled cells with biocytin and processed for histological  
30 reconstruction using NeuroLucida. **Figure 7A** shows the approximate locations of the  
31 reconstructed neurons. Sholl analysis (**Figure 7C**) demonstrated that, in general, MD-M  
32 neurons were larger and more complex than neurons from MD-L. Sholl length (dendrite length

1 within each concentric circle) was greater for medial neurons than lateral neurons (**Figure 7F**;  
2 Two-way ANOVA, main effect of MD subnucleus;  $F(1, 315) = 73.22$ ;  $p < 0.0001$ ; Sidak's  
3 multiple comparisons test: 90 - 165  $\mu\text{m}$  from the soma, adjusted  $p$  values  $< 0.005$ ). The number  
4 of Sholl intersections was also greater for medial neurons than lateral neurons (**Figure 7G**;  
5 Two-way ANOVA, main effect of MD subnucleus;  $F(1, 315) = 84.98$ ;  $p < 0.0001$ ; Sidak's  
6 multiple comparisons test: 105 - 165  $\mu\text{m}$  from the soma, adjusted  $p$  values  $\leq 0.005$ ). Dendritic  
7 volume was greater in medial cells compared to lateral (**Figure 7D**; MD-M:  $8562787 \pm 2431041$   
8  $\mu\text{m}^3$  ( $n = 7$  neurons); MD-L:  $4290298 \pm 2248141 \mu\text{m}^3$  ( $n = 10$  neurons); Mann-Whitney test;  $U =$   
9  $5$ ;  $p = 0.002$ ). Finally, dendritic complexity (Pillai et al., 2012) was increased in medial neurons  
10 compared to lateral neurons (**Figure 7E**; MD-M:  $245596 \pm 119022$  ( $n = 7$  neurons); MD-L:  
11  $114497 \pm 28860$  arbitrary units ( $n = 10$  neurons); Mann-Whitney test;  $U = 6$ ;  $p = 0.0031$ ).

## 12 **DISCUSSION**

13 **Summary of findings.** Projections from MD→mPFC are required for executive functioning  
14 and social behavior (Parnaudeau et al., 2013, 2015; Bolkan et al., 2017; Schmitt et al., 2017;  
15 Ferguson and Gao, 2018; Rikhye et al., 2018). However, MD contains at least 3 identifiable  
16 subnuclei, two of which (MD-M and MD-L) provide substantial ascending input to mPFC. Given  
17 their spatial separation and distinct inputs and outputs, we hypothesized that the MD→mPFC  
18 projections in MD-M and MD-L are composed of populations of neurons with distinct intrinsic  
19 properties and morphologies. Here, we recorded from  $>100$  neurons in the medial (MD-M) and  
20 lateral (MD-L) divisions of the mouse MD thalamus that were identified as projecting to  
21 ipsilateral medial prefrontal cortex (mPFC) using a retrograde tracer. Overall, we found that  
22 MD→mPFC neurons in the medial and lateral divisions of MD significantly differ in their  
23 physiological properties and dendritic morphology. MD-M cells had longer membrane time  
24 constants, higher cellular membrane resistance, more readily fired action potentials in response  
25 to small current inputs, and had larger, more complex dendritic arbors. MD-L cells on the other  
26 hand, tended to have faster membrane time constants, lower resistance, higher HCN-mediated  
27 voltage changes, and simpler dendritic arbors.

28 **Comparison to previous studies.** This is the first study dedicated to understanding the  
29 physiology of adult MD→mPFC neurons. Surprisingly, only three published studies to our  
30 knowledge have measured whole cell physiology in MD neurons (Rajasekaran et al., 2007; Lee  
31 et al., 2011; Collins et al., 2018), none of which compared subnuclei. Collins *et al.* recorded  
32 primarily from MD-L→mPFC neurons in mice age P28 – P42. They reported RMP of around -65

1 mV (range -60 to -70 mV),  $R_m$  175 M $\Omega$  (range 100 – 250),  $T_M$  in the low 20's ms (range 15 – 35),  
2 an average of 3 rebound action potentials (range 0 – 7) in response to hyperpolarizing current  
3 steps, and fire up to about 60 Hz in response to +300 pA square pulses. There were no  
4 estimates of HCN channel activity reported. Lee *et al.* reported single cell recordings from MD  
5 neurons at P19 – P21. MD neurons had firing rates of around 60 Hz in response to +300 pA  
6 square pulses. The wildtype neurons in that report fired 1 – 6 rebound action potentials following  
7 membrane hyperpolarization.

8 The results we present differed from previous reports in the age of the animals (we recorded  
9 in 8 – 12 week old mice), in specifically comparing MD-M→mPFC neurons with MD-L→mPFC  
10 neurons, and in measuring and comparing HCN channel activity, one of the major contributors  
11 to membrane resistance. Our results complement estimates of rat MD-M and MD-L morphology  
12 that suggested a tendency toward larger neurons in MD-M compared to MD-L (e.g. (Kuramoto  
13 *et al.*, 2017)). Our results also provide evidence in rodent that complement the histological  
14 features observed in nonhuman primates that form the basis for MD-M being dubbed “pars  
15 magnocellularis” (large cells) and MD-L known as “pars parvicellularis” (small cells) (Ray and  
16 Price, 1993).

17 **Strengths and limitations of this study.** Strengths of the current study include the well-  
18 defined circuit (MD→mPFC neurons), the large number of neurons sampled, and multiple  
19 regions sampled along the DV / ML / and AP axes. Unfortunately, we had too few neurons  
20 reconstructed to be able to make meaningful correlations between neuron structure and function  
21 in this report. In this study, we did not distinguish between prelimbic and infralimbic cortices with  
22 our retrograde tracer injections. Both MD-M and MD-L project to mPFC, and the axon terminals  
23 extend over hundreds of micrometers and do not necessarily observe borders between anterior  
24 cingulate, prelimbic, and infralimbic cortex (Kuramoto *et al.*, 2017). There may be a dorsal-  
25 ventral / lateral-medial topography of mPFC-MD connectivity in which ventral mPFC (**vmPFC**)  
26 (which is associated with monitoring of emotions) has stronger connectivity with **MD-M**. By  
27 contrast, dorsal mPFC (**dmPFC**), which is associated with monitoring actions and cognition,  
28 may have relatively increased connectivity with **MD-L** (Frith and Frith, 2006; Hunnicutt *et al.*,  
29 2014; Mátyás *et al.*, 2014; Vertes *et al.*, 2015; Alcaraz *et al.*, 2016; Bolkan *et al.*, 2017; Åhrlund-  
30 Richter *et al.*, 2019). Smaller, more precise injections that target either anterior cingulate,  
31 prelimbic, or infralimbic may further delineate cellular groupings. In addition, future work to  
32 determine molecular and genetic classifications of neurons through immunohistochemistry and

1 single-cell RNA sequencing may help further delineate functional groups of projection neurons  
2 (Phillips et al., 2019).

3 ***Implications of differences between MD-M and MD-L.*** MD-M→mPFC neurons have  
4 higher resistance and longer membrane time constants. We predict that this will provide MD-  
5 M→mPFC neurons a longer time window for temporal integration of synaptic inputs compared  
6 to MD-L→mPFC neurons. This could make MD-M neurons more sensitive to responding to  
7 poorly-coordinated inputs. This would be in contrast to MD-L cells that would potentially need  
8 inputs to be more closely-timed to summate and depolarize the membrane past the action  
9 potential threshold. Future work will involve understanding how different MD→mPFC neurons  
10 process incoming synaptic information. Even within MD-M and MD-L, there is a wide distribution  
11 of membrane resistance and time constants. The functional consequence of this is yet to be  
12 determined. Of note, variance of subthreshold intrinsic properties within thalamocortical neurons  
13 is hypothesized to improve information transfer in the circuit (Béhuret et al., 2015).

14 We observed that although MD-L→mPFC neurons have a higher rheobase (i.e. require  
15 more current to elicit spiking), their action potential threshold is more negative compared to MD-  
16 M→mPFC neurons. This implies that differences in voltage-gated sodium channels do not likely  
17 play a role in the decreased spiking input / output relationship for MD-L neurons compared to  
18 MD-M neurons. The relatively depolarized action potential threshold in MD-M neurons could  
19 possibly be explained by MD-M→mPFC neurons' longer time constants, which can lead to  
20 deactivation of voltage-gated sodium channels in neurons (Howard and Rubel, 2010). This  
21 would need to be tested directly.

22 In prefrontal cortex and the CA1 region of hippocampus, principal cells can be distinguished  
23 based on HCN-channel mediated voltage sag (Jarsky et al., 2008; Dembrow et al., 2010;  
24 Maroso et al., 2016). Here, we did not find a specific cut-off between cell types based on voltage  
25 sag, but rather a smooth continuum of voltage sag that was on average higher in MD-L→mPFC  
26 neurons. There is growing interest in HCN channel activity for its role in axonal (Ko et al., 2016)  
27 and dendritic (Vaidya and Johnston, 2013) signaling, but also for its roles in epilepsy (Bernard et  
28 al., 2004), depression (Kim et al., 2017), neurodevelopmental disorders (Omrani et al., 2015;  
29 Brandalise et al., 2020), and neurodegenerative disorders (Chang et al., 2019). Further studies  
30 can parse out whether differences between cell types is due to expression levels, subunit  
31 composition, or biophysical properties.



1        Regarding differences in neuronal morphology, one implication of MD-M→mPFC neurons  
2        having larger and more complex dendritic arbors compared to MD-L→mPFC neurons is that  
3        each input onto the MD-M neuron may exert less influence over the neuron's activity. This  
4        would be in contrast to MD-L neurons with their smaller dendritic arbors, thus fewer synaptic  
5        inputs would influence a given neuron's input/output function. These morphological findings  
6        could complement the physiological findings to fit with a model of MD-M→mPFC neurons being  
7        optimized for sensitivity (more inputs that don't need to be precisely timed) and MD-L→mPFC  
8        neurons optimized for specificity (fewer inputs that need to be more precisely timed to elicit  
9        action potentials).

10       Here, we identified and recorded from MD neurons that project to mPFC. MD neurons,  
11       however, are known to project to multiple downstream targets via branched axons (Kuramoto et  
12       al., 2017). Thus, the MD→mPFC neurons we recorded from may also project to other  
13       postsynaptic targets besides mPFC. Thus, the differences in intrinsic physiology we observed in  
14       MD→mPFC neurons in this report has implications for streams of information destined for  
15       mPFC and also for other postsynaptic targets of MD such as orbitofrontal cortex, the reticular  
16       nucleus of the thalamus, and the frontal eye fields.

17       Though differences in the prefrontal thalamocortical network have been identified in  
18       neuropsychiatric disorders, it is not yet known if differences in macroscopic network function  
19       reflect differences in the physiological properties of the neurons that make up the network.  
20       Understanding the physiology of the projections from MD→mPFC in typically developing  
21       animals as we have done here lays the foundation for understanding differences in the  
22       MD→mPFC network in neurodevelopmental and neuropsychiatric disorders.

## 23       **FUNDING**

24       This work was supported by NIH / NINDS K08, the PERF Elterman research grant, the Phillip R.  
25       Dodge Young Investigator Award, the STARS award from The University of Texas System,  
26       startup funds from Dell Medical School, and laboratory space from the College of Natural  
27       Sciences at UT Austin.

## 28       **ACKNOWLEDGEMENTS**



1 We thank Meredith McCarty, Aurora Weiden, Madelynn Campbell, Joy Adler, and Mendee Geist  
2 for their technical assistance. We thank members of the Brumback and Howard labs (especially  
3 Jessica Chancey and MacKenzie Howard) and Dan Johnston for helpful discussions.

#### 4 **CONTRIBUTIONS**

5 P.L. performed electrophysiological recordings. A.K. performed cellular morphology  
6 experiments, analyzed all cellular morphology data, and wrote portions of the paper. A.B.  
7 conceived of the project, designed all experiments, wrote all code, analyzed all data, and wrote  
8 the paper. All authors approved the final manuscript prior to publication.

#### 9 **REFERENCES**

- 10  
11
- 12 Ährlund-Richter S, Xuan Y, Lunteren JA van, Kim H, Ortiz C, Dorocic IP, Meletis K, Carlén M  
13 (2019) A whole-brain atlas of monosynaptic input targeting four different cell types in the  
14 medial prefrontal cortex of the mouse. *Nat Neurosci* 22:657–668.
- 15 Alcaraz F, Fresno V, Marchand AR, Kremer EJ, Coutureau E, Wolff M (2018) Thalamocortical  
16 and corticothalamic pathways differentially contribute to goal-directed behaviors in the rat.  
17 *Elife* 7:e32517.
- 18 Alcaraz F, Marchand AR, Courtand G, Coutureau E, Wolff M (2016) Parallel inputs from the  
19 mediodorsal thalamus to the prefrontal cortex in the rat Acsády L, ed. *Eur J Neurosci*  
20 44:1972–1986.
- 21 Alexander GE, Fuster JM (1973) Effects of cooling prefrontal cortex on cell firing in the nucleus  
22 medialis dorsalis. *Brain Res* 61:93–105.
- 23 Béhuret S, Deleuze C, Bal T (2015) Corticothalamic Synaptic Noise as a Mechanism for  
24 Selective Attention in Thalamic Neurons. *Front Neural Circuit* 9:80.
- 25 Bernard C, Anderson A, Becker A, Poolos NP, Beck H, Johnston D (2004) Acquired Dendritic  
26 Channelopathy in Temporal Lobe Epilepsy. *Science* 305:532–535.
- 27 Bolkan SS, Stujenske JM, Parnaudeau S, Spellman TJ, Rauffenbart C, Abbas AI, Harris AZ,  
28 Gordon JA, Kellendonk C (2017) Thalamic projections sustain prefrontal activity during  
29 working memory maintenance. *Nature Neuroscience* 20:987–996.
- 30 Brandalise F, Kalmbach BE, Mehta P, Thornton O, Johnston D, Zemelman BV, Brager DH  
31 (2020) Fragile X Mental Retardation Protein Bidirectionally Controls Dendritic I h in a Cell  
32 Type-Specific Manner between Mouse Hippocampus and Prefrontal Cortex. *J Neurosci*  
33 40:5327–5340.

- 1 Chang X, Wang J, Jiang H, Shi L, Xie J (2019) Hyperpolarization-Activated Cyclic Nucleotide-  
2 Gated Channels: An Emerging Role in Neurodegenerative Diseases. *Front Mol Neurosci*  
3 12:141.
- 4 Collins DP, Anastasiades PG, Marlin JJ, Carter AG (2018) Reciprocal Circuits Linking the  
5 Prefrontal Cortex with Dorsal and Ventral Thalamic Nuclei. *Neuron* 98:366-379.e4 Available  
6 at: [http://www.cell.com/neuron/fulltext/S0896-6273\(18\)30230-7](http://www.cell.com/neuron/fulltext/S0896-6273(18)30230-7).
- 7 Dembrow NC, Chitwood RA, Johnston D (2010) Projection-Specific Neuromodulation of Medial  
8 Prefrontal Cortex Neurons. *J Neurosci* 30:16922–16937 Available at:  
9 <http://www.jneurosci.org/cgi/doi/10.1523/JNEUROSCI.3644-10.2010>.
- 10 Fan Y, Fricker D, Brager DH, Chen X, Lu H-C, Chitwood RA, Johnston D (2005) Activity-  
11 dependent decrease of excitability in rat hippocampal neurons through increases in Ih. *Nat*  
12 *Neurosci* 8:nn1568.
- 13 Ferguson BR, Gao W-J (2018) Thalamic Control of Cognition and Social Behavior Via  
14 Regulation of Gamma-Aminobutyric Acidergic Signaling and Excitation/Inhibition Balance in  
15 the Medial Prefrontal Cortex. *Biological Psychiatry* 83:657 669 Available at:  
16 <http://linkinghub.elsevier.com/retrieve/pii/S0006322317322564>.
- 17 Frith CD, Frith U (2006) The Neural Basis of Mentalizing. *Neuron* 50:531–534.
- 18 Fuster J, Alexander G (1973) Firing changes in cells of the nucleus medialis dorsalis associated  
19 with delayed response behavior. *Brain Res* 61:79–91.
- 20 Grodd W, Kumar VJ, Schüz A, Lindig T, Scheffler K (2020) The anterior and medial thalamic  
21 nuclei and the human limbic system: tracing the structural connectivity using diffusion-  
22 weighted imaging. *Sci Rep-uk* 10:10957.
- 23 Howard MA, Rubel EW (2010) Dynamic spike thresholds during synaptic integration preserve  
24 and enhance temporal response properties in the avian cochlear nucleus. *J Neurosci Official*  
25 *J Soc Neurosci* 30:12063–12074.
- 26 Huber KM, Gallagher SM, Warren ST, Bear MF (2002) Altered synaptic plasticity in a mouse  
27 model of fragile X mental retardation. *Proceedings of the National Academy of*  
28 *Sciences*:7746 7750.
- 29 Hunnicutt BJ, Long BR, Kusefoglou D, Gertz KJ, Zhong H, Mao T (2014) A comprehensive  
30 thalamocortical projection map at the mesoscopic level. *Nat Neurosci* 17:nn.3780.
- 31 Hwang K, Bruss J, Tranel D, Boes AD (2020) Network Localization of Executive Function  
32 Deficits in Patients with Focal Thalamic Lesions. *J Cognitive Neurosci* 28:1–16.
- 33 Jarsky T, Mady R, Kennedy B, Spruston N (2008) Distribution of bursting neurons in the CA1  
34 region and the subiculum of the rat hippocampus. *J Comp Neurol* 506:535–547.
- 35 Kim CS, Brager DH, Johnston D (2017) Perisomatic changes in h-channels regulate depressive  
36 behaviors following chronic unpredictable stress. *Mol Psychiatr* 23:892.

- 1 Ko KW, Rasband MN, Meseguer V, Kramer RH, Golding NL (2016) Serotonin modulates spike  
2 probability in the axon initial segment through HCN channels. *Nature Neuroscience* 19:826  
3 834.
- 4 Kuramoto E, Pan S, Furuta T, Tanaka YR, Iwai H, Yamanaka A, Ohno S, Kaneko T, Goto T,  
5 Hioki H (2017) Individual mediodorsal thalamic neurons project to multiple areas of the rat  
6 prefrontal cortex: A single neuron-tracing study using virus vectors: Prefrontal projections of  
7 mediodorsal nucleus neurons. *J Comp Neurol* 525:166–185 Available at:  
8 <http://doi.wiley.com/10.1002/cne.24054>.
- 9 Lee S, Ahmed T, Lee S, Kim H, Choi S, Kim D-S, Kim SJ, Cho J, Shin H-S (2011) Bidirectional  
10 modulation of fear extinction by mediodorsal thalamic firing in mice. *Nat Neurosci* 15:308–  
11 314.
- 12 Maroso M, Szabo GG, Kim HK, Alexander A, Bui AD, Lee S-H, Lutz B, Soltesz I (2016)  
13 Cannabinoid Control of Learning and Memory through HCN Channels. *Neuron* 89:1059–  
14 1073.
- 15 Mátyás F, Lee J, Shin H, Acsády L (2014) The fear circuit of the mouse forebrain: connections  
16 between the mediodorsal thalamus, frontal cortices and basolateral amygdala. *European*  
17 *Journal of Neuroscience* 39:1810–1823.
- 18 Omrani A, Vaart T van der, Mientjes E, Woerden GM van, Hojjati MR, Li KW, Gutmann DH,  
19 Levelt CN, Smit AB, Silva AJ, Kushner SA, Elgersma Y (2015) HCN channels are a novel  
20 therapeutic target for cognitive dysfunction in Neurofibromatosis type 1. *Mol Psychiatr*  
21 20:1311–1321.
- 22 Ouhaz Z, Fleming H, Mitchell AS (2018) Cognitive Functions and Neurodevelopmental  
23 Disorders Involving the Prefrontal Cortex and Mediodorsal Thalamus. *Frontiers in*  
24 *Neuroscience* 12:33.
- 25 Parnaudeau S, O'Neill P-K, Bolkan SS, Ward RD, Abbas AI, Roth BL, Balsam PD, Gordon JA,  
26 Kellendonk C (2013) Inhibition of Mediodorsal Thalamus Disrupts Thalamofrontal  
27 Connectivity and Cognition SUPPLEMENTAL INFORMATION. *Neuron* 77:1151–1162.
- 28 Parnaudeau S, Taylor K, Bolkan SS, Ward RD, Balsam PD, Kellendonk C (2015) Mediodorsal  
29 Thalamus Hypofunction Impairs Flexible Goal-Directed Behavior. *Biol Psychiatr* 77:445–453.
- 30 Phillips JW, Schulmann A, Hara E, Winnubst J, Liu C, Valakh V, Wang L, Shields BC, Korff W,  
31 Chandrashekar J, Lemire AL, Mensh B, Dudman JT, Nelson SB, Hantman AW (2019) A  
32 repeated molecular architecture across thalamic pathways. *Nat Neurosci*:1–11.
- 33 Pillai AG, Jong D de, Kanatsou S, Krugers H, Knapman A, Heinzmann J-M, Holsboer F,  
34 Landgraf R, Joëls M, Touma C (2012) Dendritic Morphology of Hippocampal and Amygdalar  
35 Neurons in Adolescent Mice Is Resilient to Genetic Differences in Stress Reactivity. *Plos*  
36 *One* 7:e38971.
- 37 Rajasekaran K, Kapur J, Bertram EH (2007) Alterations in GABA A Receptor Mediated  
38 Inhibition in Adjacent Dorsal Midline Thalamic Nuclei in a Rat Model of Chronic Limbic  
39 Epilepsy. *J Neurophysiol* 98:2501–2508.

- 1 Ray JP, Price JL (1993) The organization of projections from the mediodorsal nucleus of the  
2 thalamus to orbital and medial prefrontal cortex in macaque monkeys. *The Journal of*  
3 *Comparative Neurology* 337:1–31.
- 4 Rikhye RV, Gilra A, Halassa MM (2018) Thalamic regulation of switching between cortical  
5 representations enables cognitive flexibility. *Nat Neurosci* 21:1753–1763.
- 6 Rose JE, Woolsey CN (1948) The orbitofrontal cortex and its connections with the mediodorsal  
7 nucleus in rabbit, sheep and cat. *Res Publ - Assoc Res Nerv Ment Dis* 27:210–232.
- 8 Schmitt LI, Wimmer RD, Nakajima M, Happ M, Mofakham S, Halassa MM (2017) Thalamic  
9 amplification of cortical connectivity sustains attentional control. *Nature* 545:219–223.
- 10 Sholl D (1953) Dendritic organization in the neurons of the visual and motor cortices of the cat. *J*  
11 *Anat* 87:387–406.
- 12 Vaidya SP, Johnston D (2013) Temporal synchrony and gamma-to-theta power conversion in  
13 the dendrites of CA1 pyramidal neurons. *Nature Publishing Group* 16:1812–1820.
- 14 Vertes RP, Linley SB, Hoover WB (2015) Limbic circuitry of the midline thalamus. *Neurosci*  
15 *Biobehav Rev* 54:89–107.
- 16 Wolff M, Vann SD (2018) The Cognitive Thalamus as a gateway to mental representations. *J*  
17 *Neurosci* 39:0479–18.
- 18

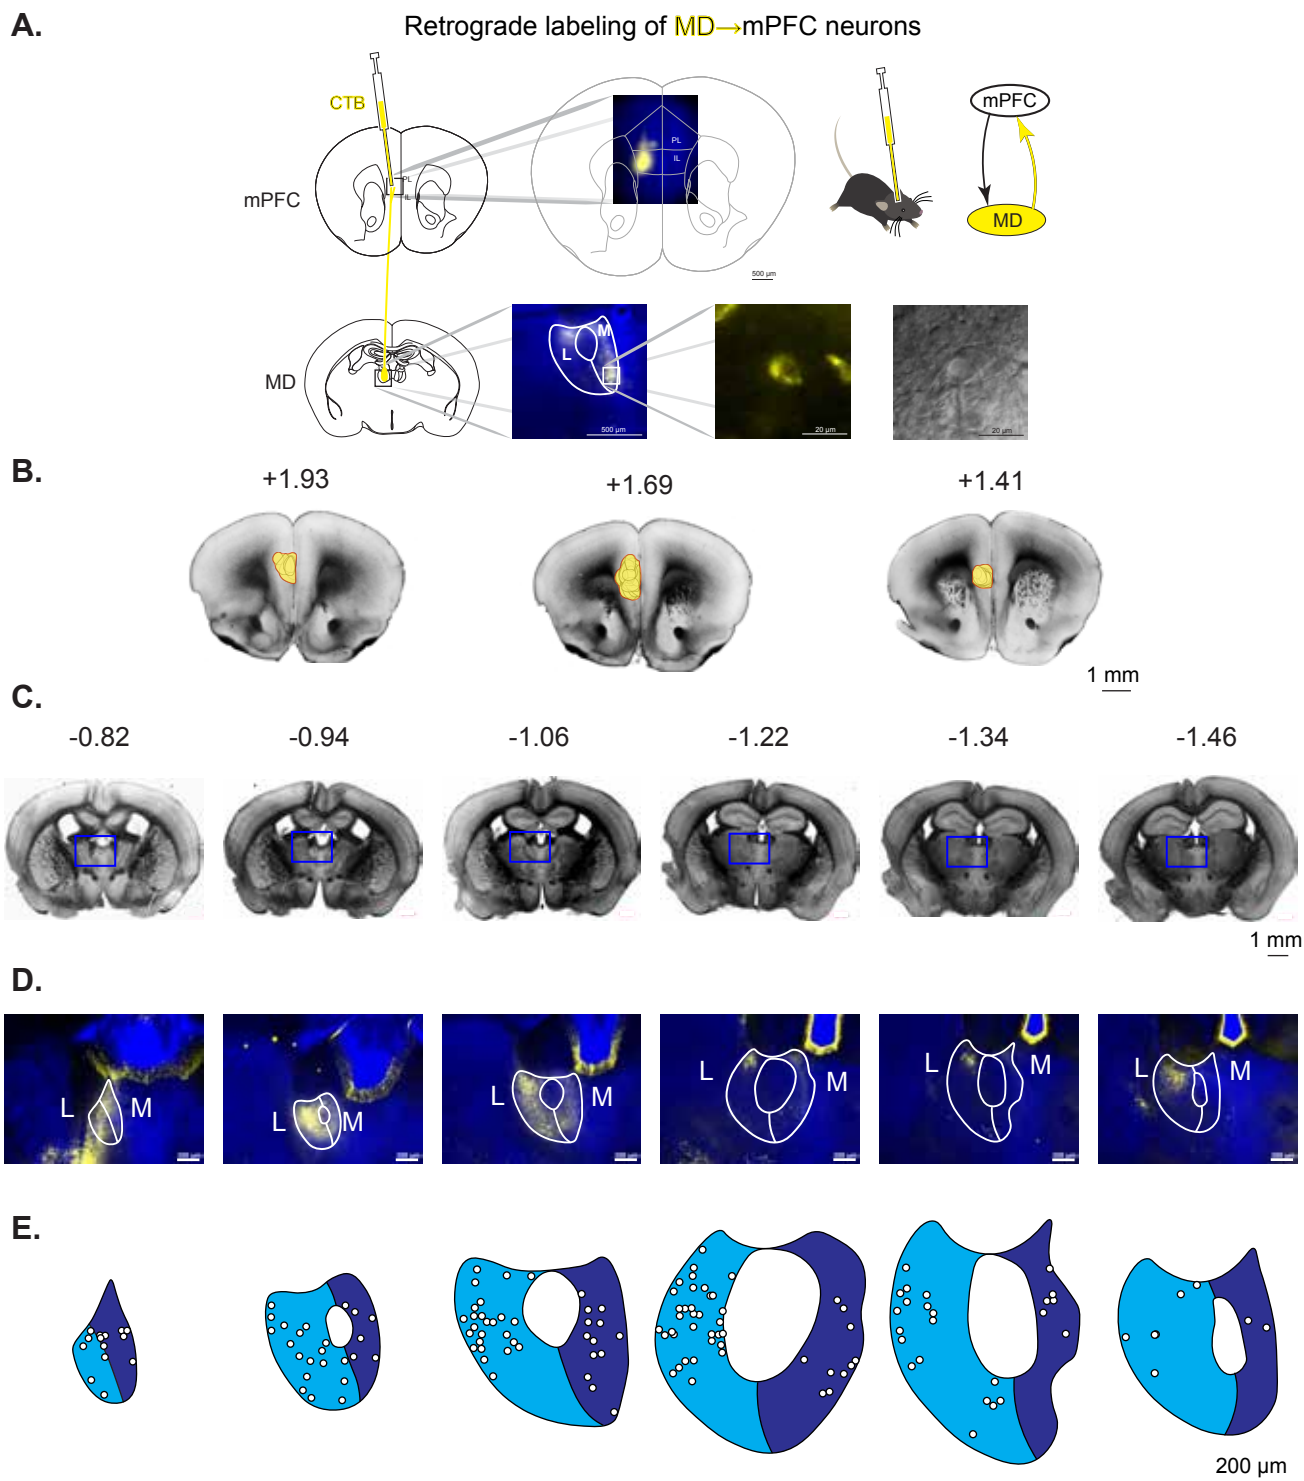

**Figure 1: MD→mPFC neurons predominantly reside in MD-M and MD-L.** **A.** Adult wildtype male and female mice were stereotaxically injected with the retrograde fluorescent tracer CTB into the right medial prefrontal cortex. Fluorescently-labeled MD→mPFC neurons were visually identified for patch clamp electrophysiology experiments. **B.** Bright field photomicrographs of coronal mouse brain slices with the estimated distance from Bregma (in mm) demonstrating the locations of the CTB injection sites in mPFC. **C.** Bright field photomicrographs of coronal mouse brain slices with the estimated distance from Bregma (in mm) demonstrating labeled cell bodies of MD→mPFC neurons. **D.** Photomicrographs (10x) of the boxed areas from **C** demonstrating MD→mPFC labeled neurons (yellow) in each of the representative slices. **E.** Map of the approximate locations of all recorded neurons reported in this manuscript placed on a single representative atlas drawing for each coronal slice. Medial MD (MD-M) is dark blue. Lateral MD (MD-L) is highlighted in cyan. This color scheme is used throughout the paper to denote MD-M→mPFC and MD-L→mPFC neurons.

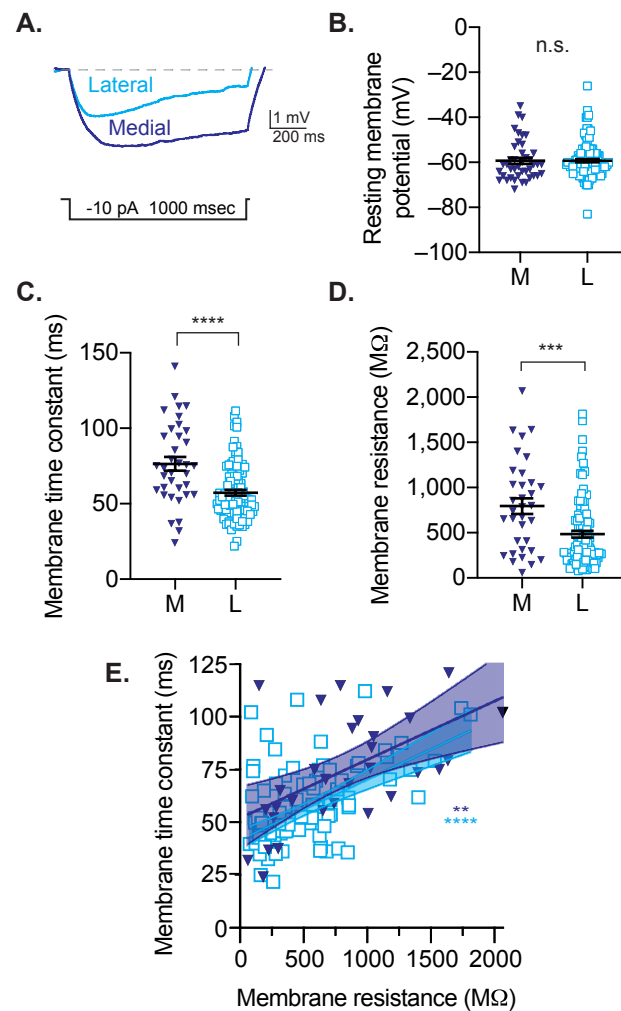

**Figure 2: Subthreshold membrane properties of prefrontal medial (MD-M) and lateral (MD-L) thalamo-cortical neurons.** **A.** Estimates of membrane time constant and input resistance using low-amplitude hyperpolarizing steps. Neurons were held in current clamp at -65 mV. **B.** There was no difference in resting membrane potentials between groups. **C.** Lateral neurons have faster membrane times constant compared to medial neurons. **D.** Membrane resistance is decreased in lateral neurons compared to medial neurons. **E.** For both medial and lateral neurons, membrane time constant is proportional to membrane resistance. Scatter plots show all data points with the mean  $\pm$  SEM. Significance is indicated as not significant (n.s.;  $p > 0.05$ ), or significant at  $p < 0.01$  (\*\*),  $p < 0.001$  (\*\*\*),  $p < 0.0001$  (\*\*\*\*).

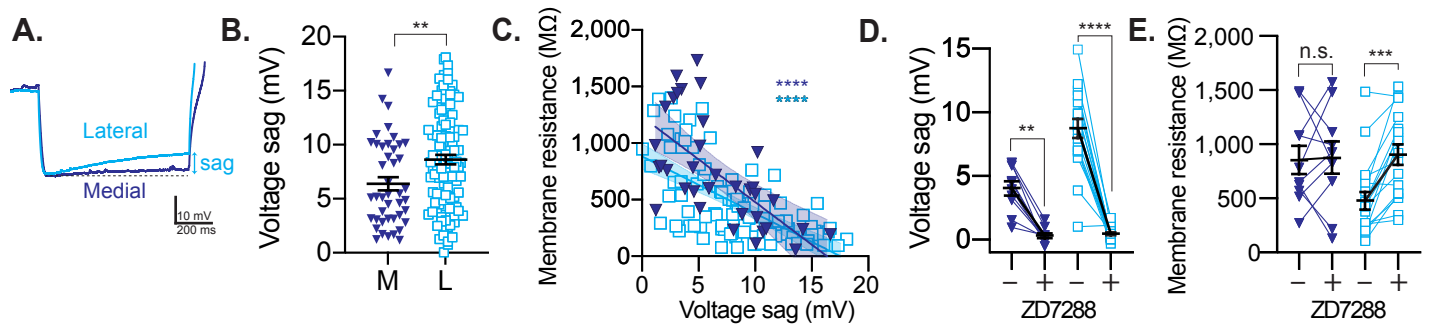

**Figure 3: MD-L  $\rightarrow$  mPFC neurons have increased voltage sag compared to MD-M  $\rightarrow$  mPFC neurons.** **A.** Representative voltage traces of MD-M and MD-L neurons in response to negative current steps causing hyperpolarization to -100 mV. Rebound action potentials are truncated to simplify display. **B.** MD-L cells have increased voltage sag compared to MD-M neurons. **C.** Neurons with higher voltage sag have lower membrane resistance. **D.** In both cell types, voltage sag decreases following bath application of the HCN channel inhibitor ZD7288 (20  $\mu$ M). **E.** In MD-L neurons, bath application of ZD7288 increases membrane resistance to the MD-M range. Scatter plots show all data points with the mean  $\pm$  SEM. Significance is indicated as not significant (n.s.),  $p < 0.05$  (\*),  $p < 0.01$  (\*\*),  $p < 0.001$  (\*\*\*),  $p < 0.0001$  (\*\*\*\*).



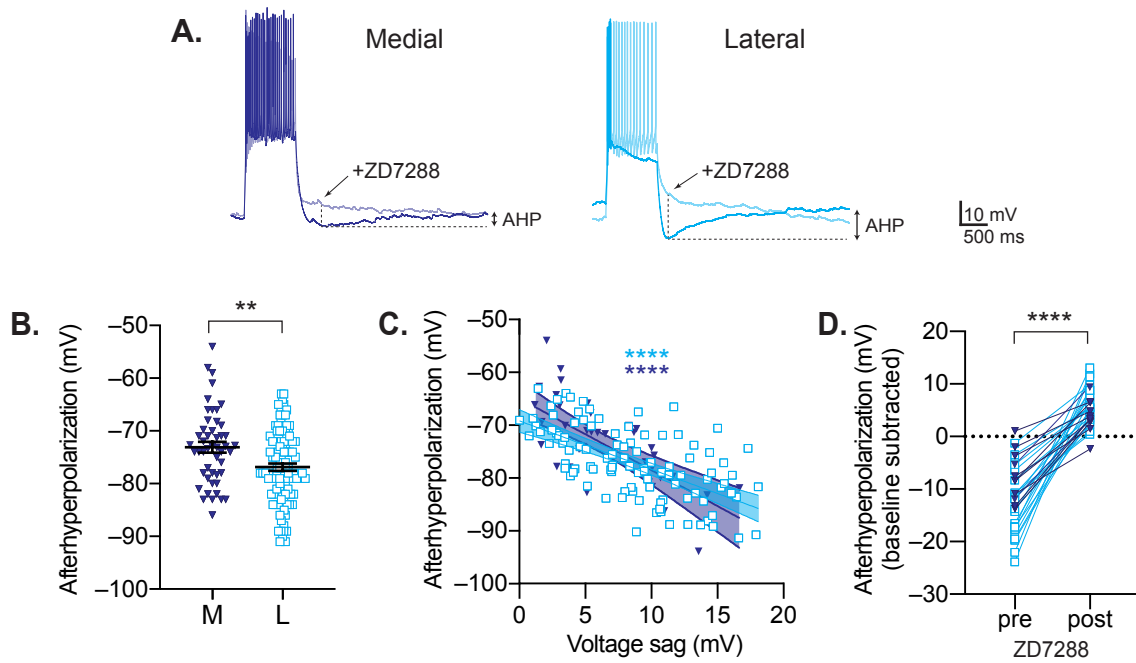

**Figure 4. Subregion differences in HCN-channel-dependent afterhyperpolarization (AHP).** **A.** Current clamp recordings of medial and lateral MD→mPFC neurons in response to a +100 pA depolarizing current step pre (dark lines) and post (light lines) bath application of ZD7288 (20  $\mu$ M), a selective inhibitor of HCN channels. **B.** In control conditions, AHP amplitude is greater in lateral cells compared to medial cells. **C.** AHP amplitude is correlated with another measure of HCN-channel activity, voltage sag. **D.** The AHP is abolished with bath application of ZD7288 in both MD-M→mPFC and MD-L→mPFC neurons. Scatter plots show all data points with the mean  $\pm$  SEM. Significance is indicated as  $p < 0.01$  (\*\*),  $p < 0.0001$  (\*\*\*\*).

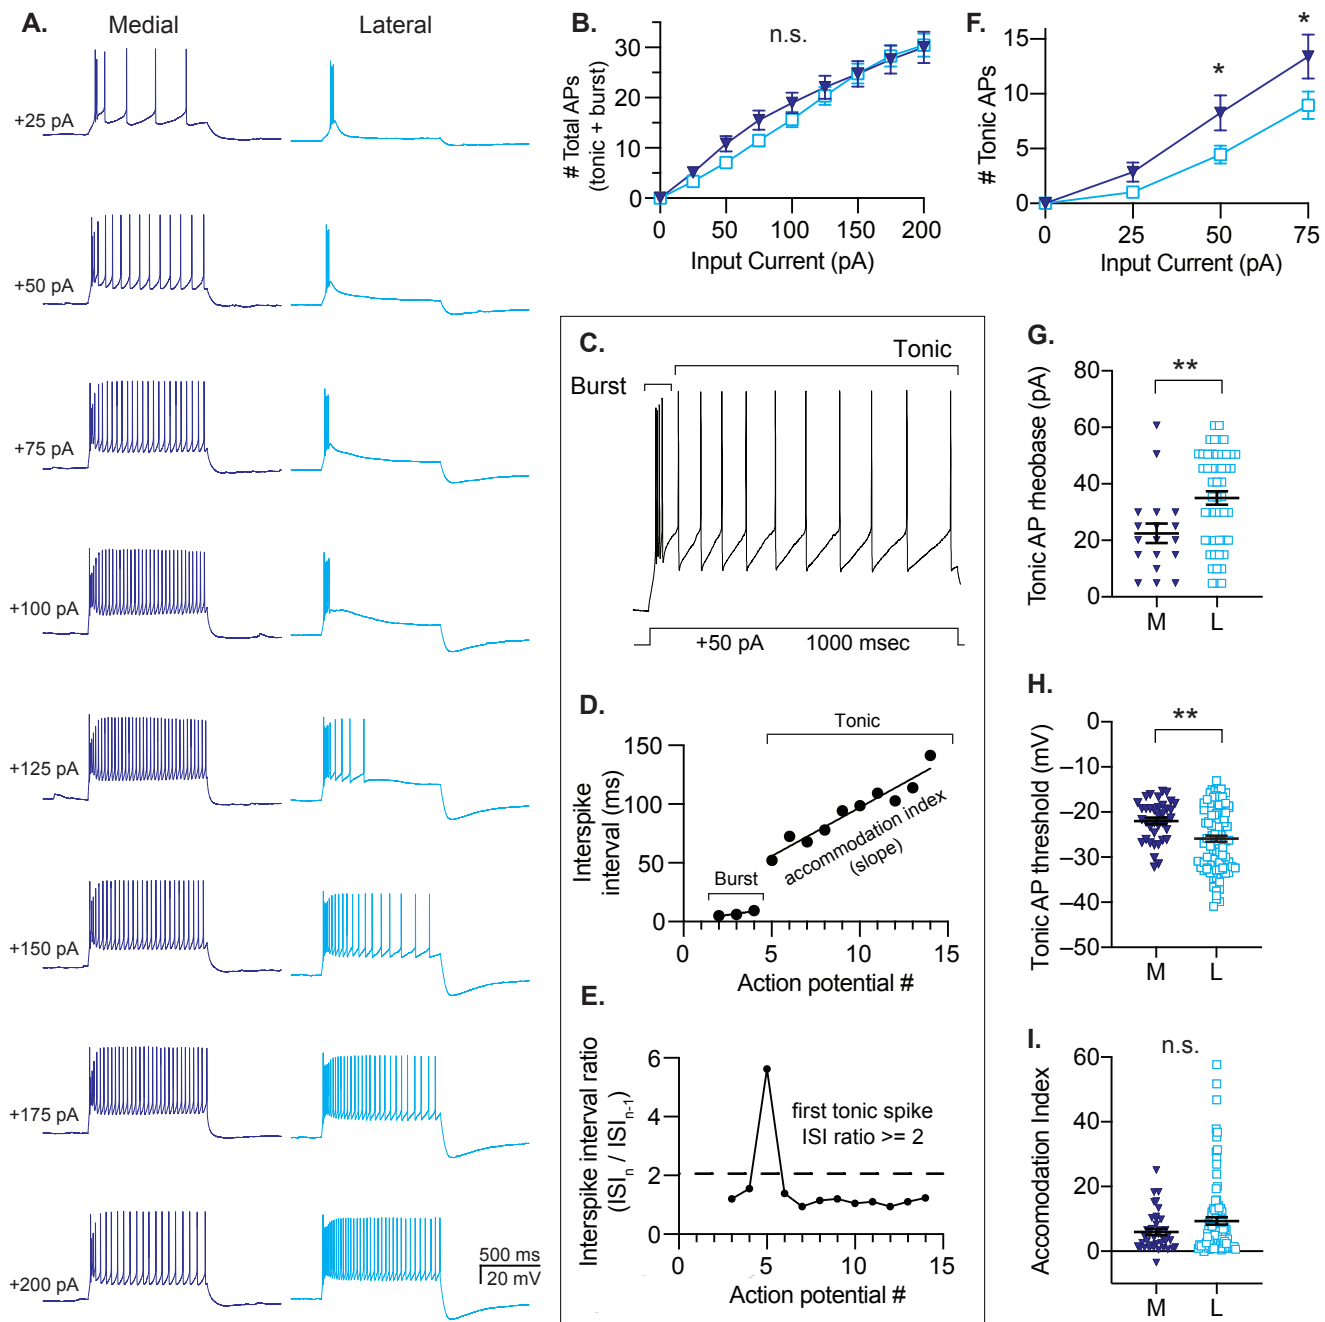

**Figure 5. Action potential generation differs between lateral and medial MD→mPFC neurons.** **A.** Representative voltage responses to 1000 ms current steps of increasing amplitude. **B.** Lateral cells fire similar numbers of action potentials in response to depolarizing current steps compared to medial cells. **C-E.** Action potentials are classified as “burst” or “tonic”. **C.** Representative voltage response to a +50 pA current step demonstrating the two phases of action potential firing. **D.** Burst spikes occur at the beginning of the current step, cluster as 2-8 spikes with interspike intervals of <40 ms. **E.** The first tonic spike is identified when there is a sharp rise in the ISI interval (>100% increase = ISI ratio >2). See Methods for details. **F.** Lateral MD→mPFC neurons generate fewer tonic action potentials in response to depolarizing current steps. **G.** The rheobase for tonic spike generation is increased in lateral neurons. **H.** Action potential threshold is more depolarized in medial cells compared to lateral cells. **I.** Accommodation index for tonic spikes is the slope of the linear fit of ISI vs. action potential # (as in **D**). Both groups had cells with a broad range of accommodation indices. There was no significant difference in mean accommodation index between groups. Scatter plots show all data points with the mean  $\pm$  SEM. Significance is indicated as not significant (n.s.;  $p > 0.05$ ), or significant at  $p < 0.05$  (\*),  $p < 0.01$  (\*\*). **B, F:** Sidak’s test. **G, H, I:** Mann-Whitney, two tailed.

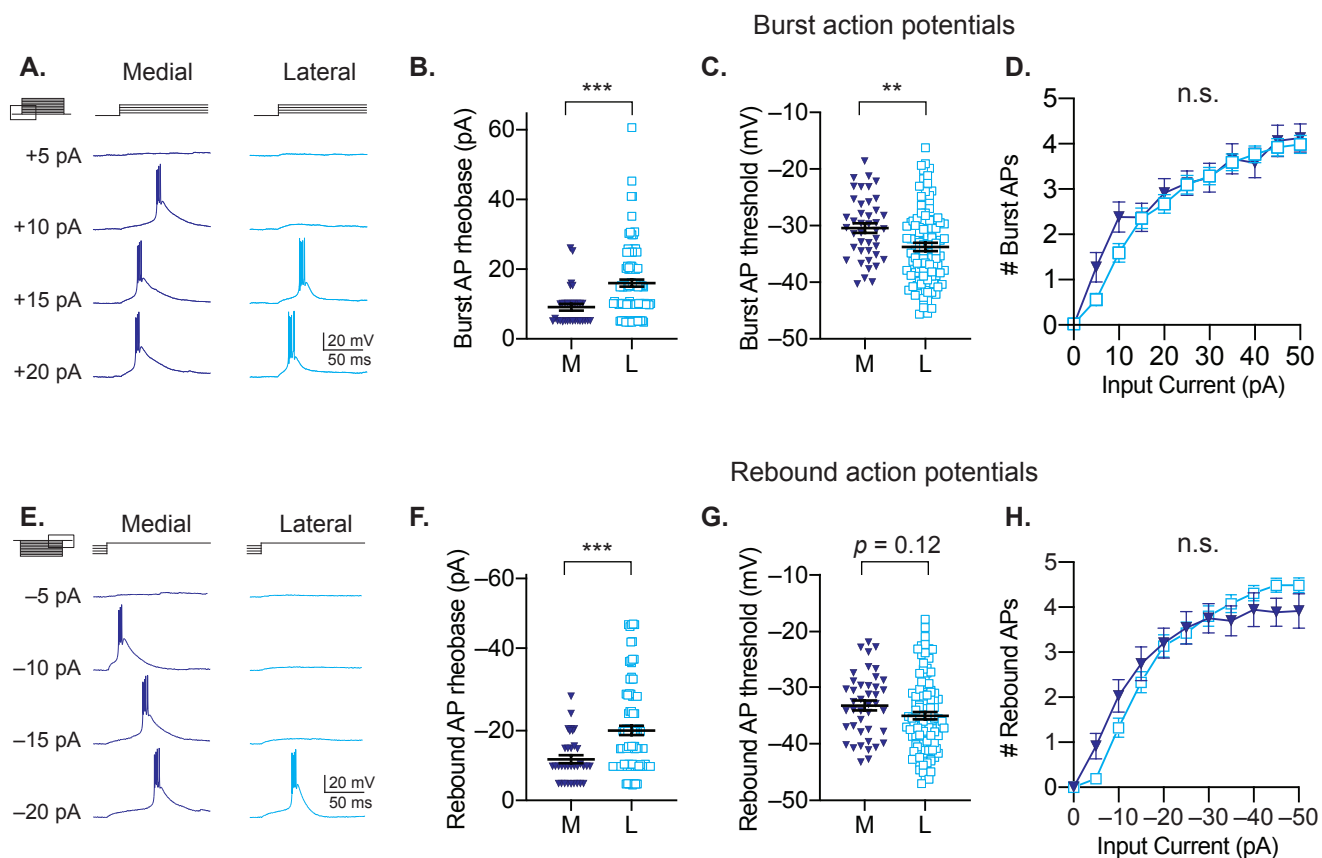

**Figure 6. Examination of burst spikes in response to depolarization (top) and rebound burst spikes following membrane hyperpolarization (bottom).** **A.** Examples of voltage responses of medial and lateral MD→mPFC neurons to depolarizing current steps. **B.** Lateral cells require more input current to fire burst action potentials (rheobase) in response to depolarizing current steps. **C.** Lateral cells have a more hyperpolarized action potential threshold compared to medial cells for bursts evoked by depolarizing current steps. **D.** The input/output curves for burst firing are not different between groups. **E.** Examples of voltage responses of medial and lateral MD→mPFC neurons following hyperpolarizing current steps of varying amplitude. **F.** Lateral cells require more input current to fire rebound action potentials (rheobase) in response to hyperpolarizing current steps. **G.** Lateral cells have a more hyperpolarized action potential threshold compared to medial cells for bursts evoked by hyperpolarizing current steps. **H.** The input/output curves are not different between groups. Scatter plots show all data points with the mean  $\pm$  SEM. Significance is indicated as not significant (n.s.;  $p > 0.05$ ), or significant at  $p < 0.01$  (\*\*) or  $p < 0.001$  (\*\*\*). For **B**, **C**, **F**, **G**: two-tailed Mann-Whitney test. For **D**, **H**: Sidak's test.

**A.**

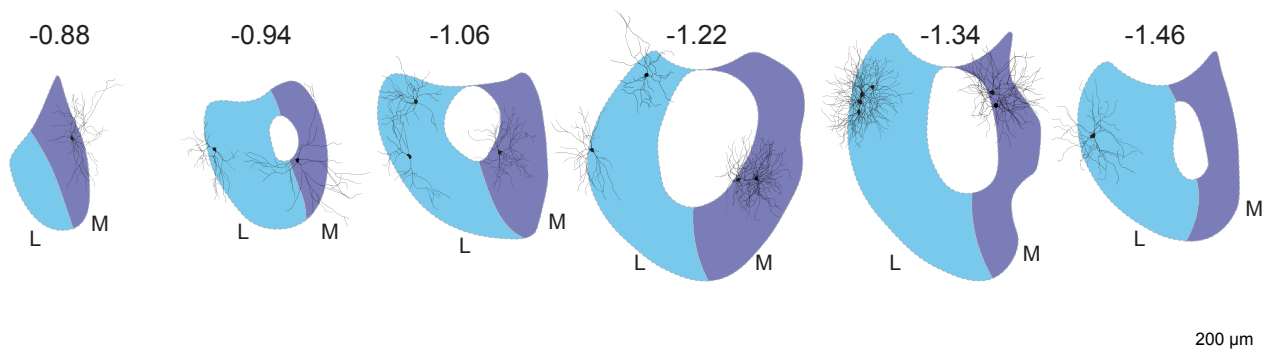

**B.**

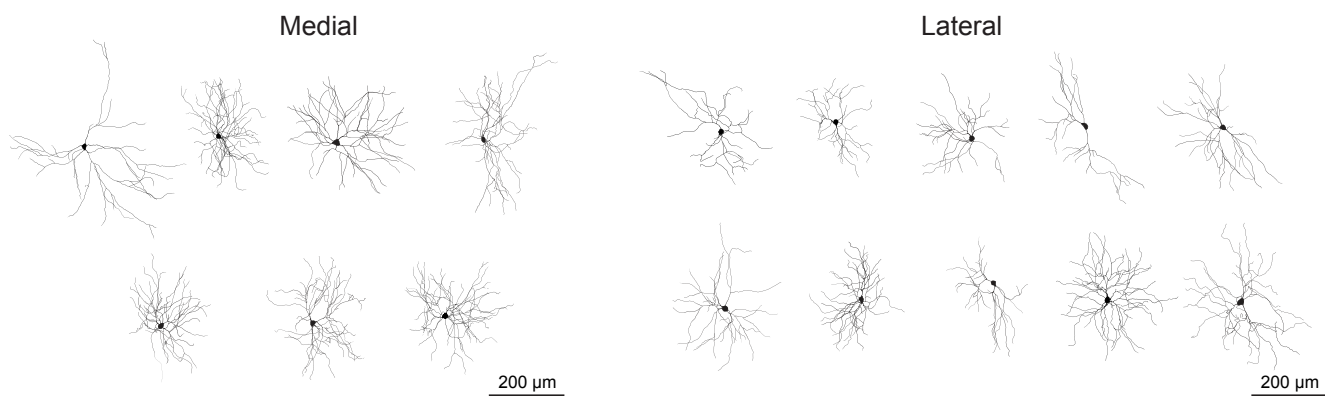

**C.**

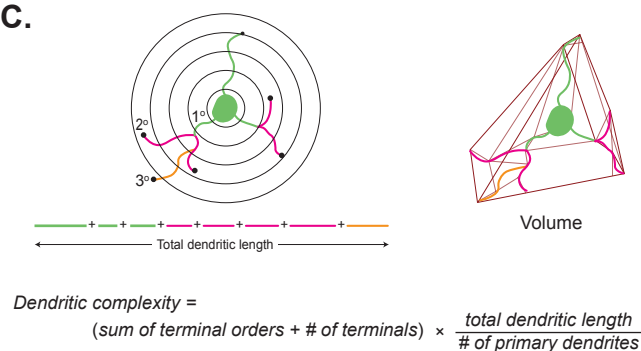

**F.**

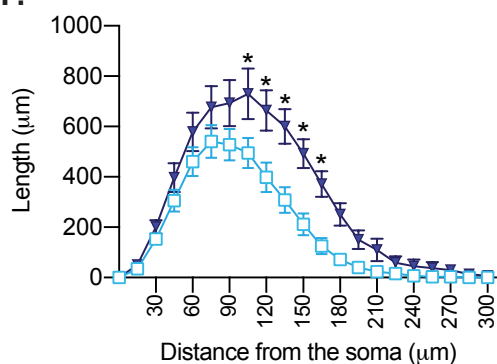

**D.**

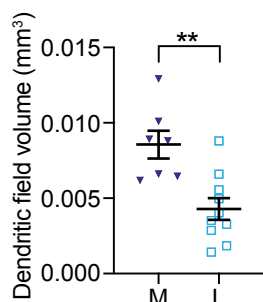

**E.**

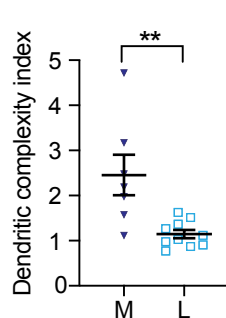

**G.**

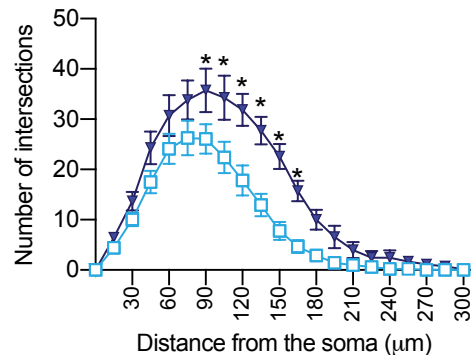

**Figure 7: MD-M→mPFC neurons have larger, more complex dendrites than MD-L→mPFC neurons do.**

**A.** Map of approximate locations of reconstructed neurons. **B.** Tracings of medial and lateral neurons. **C.** Diagram example of analyses performed for reconstructed cells

**D.** Medial neurons had greater field volume than lateral. **E.** Medial neurons had higher complexity index than lateral. **F. & G.** Sholl plots of dendritic length in each circle and total number of intersections with each circle. Scatter plots show all data points with the mean  $\pm$  SEM. Significance is indicated at  $p < 0.05$  (\*),  $p < 0.01$  (\*\*). For **D, E**: two-tailed Mann-Whitney test. For **F, G**: Sidak's test.
